# In-Cell NMR Characterization of the Secondary Structure Populations of a Disordered Conformation of $\alpha$ -Synuclein within *E. coli* Cells

Christopher A. Waudby<sup>1</sup>, Carlo Camilloni<sup>2</sup>, Anthony W. P. Fitzpatrick<sup>2</sup>, Lisa D. Cabrita<sup>1</sup>, Christopher M. Dobson<sup>2</sup>, Michele Vendruscolo<sup>2</sup>, John Christodoulou<sup>1\*</sup>

**1** Institute of Structural and Molecular Biology, University College London and Birkbeck College, London, United Kingdom, **2** Department of Chemistry, University of Cambridge, Cambridge, United Kingdom

## Abstract

$\alpha$ -Synuclein is a small protein strongly implicated in the pathogenesis of Parkinson's disease and related neurodegenerative disorders. We report here the use of in-cell NMR spectroscopy to observe directly the structure and dynamics of this protein within *E. coli* cells. To improve the accuracy in the measurement of backbone chemical shifts within crowded in-cell NMR spectra, we have developed a deconvolution method to reduce inhomogeneous line broadening within cellular samples. The resulting chemical shift values were then used to evaluate the distribution of secondary structure populations which, in the absence of stable tertiary contacts, are a most effective way to describe the conformational fluctuations of disordered proteins. The results indicate that, at least within the bacterial cytosol,  $\alpha$ -synuclein populates a highly dynamic state that, despite the highly crowded environment, has the same characteristics as the disordered monomeric form observed in aqueous solution.

**Citation:** Waudby CA, Camilloni C, Fitzpatrick AWP, Cabrita LD, Dobson CM, et al. (2013) In-Cell NMR Characterization of the Secondary Structure Populations of a Disordered Conformation of  $\alpha$ -Synuclein within *E. coli* Cells. PLoS ONE 8(8): e72286. doi:10.1371/journal.pone.0072286

**Editor:** Piero Andrea Temussi, Università di Napoli Federico II, Italy

**Received:** May 28, 2013; **Accepted:** July 15, 2013; **Published:** August 26, 2013

**Copyright:** © 2013 Waudby et al. This is an open-access article distributed under the terms of the Creative Commons Attribution License, which permits unrestricted use, distribution, and reproduction in any medium, provided the original author and source are credited.

**Funding:** This work was supported by the Wellcome Trust (WT097806MA, www.wellcome.ac.uk). The funders had no role in study design, data collection and analysis, decision to publish, or preparation of the manuscript.

**Competing Interests:** The authors have declared that no competing interests exist.

\* E-mail: j.christodoulou@ucl.ac.uk

## Introduction

$\alpha$ -Synuclein ( $\alpha$ Syn) is a 140-residue protein whose aggregation process is strongly implicated in the pathogenesis of Parkinson's disease and dementia with Lewy bodies [1,2]. The monomeric form of this protein has been studied extensively in aqueous solution by a wide range of biophysical methods revealing a compact intrinsically disordered state without persistent secondary or tertiary structure [3–6]. Measurements of the hydrodynamic radius of this species have revealed that the structural ensemble is more compact than that expected for a random coil state [6], and NMR measurements of residual dipolar couplings and paramagnetic relaxation enhancements have identified weak interactions between the negatively charged C-terminal region (residues 100–140) and the positively charged N-terminal region (residues 1–100) and, in particular, with the hydrophobic NAC region (residues 60–90) [7–10]. It has also been observed, however, that in the presence of curved, anionic lipid surfaces the N-terminal region adopts essentially complete  $\alpha$ -helical structure [11–13].

Although NMR spectroscopy is routinely applied to the study of structure and dynamics of proteins in vitro, recently the feasibility of performing high-resolution spectroscopic studies of proteins directly within living cells has been demonstrated – an approach termed ‘in-cell NMR’ [14–17]. One of the first systems to be observed was  $\alpha$ Syn, and both the in-cell HSQC and the directly-detected CON spectra of  $\alpha$ Syn expressed within bacterial cells have been reported to be similar to that of the isolated protein

[18–21]. These observations indicated that  $\alpha$ Syn remains intrinsically disordered within the cytosolic environment, and subsequent <sup>19</sup>F NMR measurements of 3-fluorotyrosine chemical shifts also showed similar chemical shifts for intracellular  $\alpha$ Syn when compared with the isolated protein [22]. The effect of N-terminal acetylation, a post-translational modification constitutively observed for  $\alpha$ Syn in vivo, has also been investigated by in-cell NMR for  $\alpha$ Syn co-expressed with the N-acetyltransferase NatB within *E. coli* cells [23]. While small chemical shift changes were observed in the isolated protein following N-terminal acetylation, consistent with the increase in the  $\alpha$ -helical population in the first 12 N-terminal residues reported from in vitro studies [24] no additional changes were observed in the HSQC spectrum of the intracellular species [23].

In the present work, we have brought together advances in the in-cell measurements of chemical shifts with progress in the analysis of secondary structure populations in disordered proteins [25], to assess directly the conformation of  $\alpha$ Syn within living cells. By determining a near-complete set of backbone chemical shift values of  $\alpha$ Syn expressed within *E. coli* cells (limited by line broadening in the N-terminus), we find that  $\alpha$ Syn populates a disordered conformation within the cell which, when compared with measurements of the isolated protein in dilute solution, is remarkably unperturbed by the highly crowded intracellular milieu.

## Materials and Methods

### Sample Preparation

Isolated  $^{13}\text{C}/^{15}\text{N}$ -labelled  $\alpha$ Syn was expressed and purified following established protocols [26]. NMR samples of *E. coli* BL21 (DE3) Gold cells (Stratagene) in which  $^{13}\text{C}/^{15}\text{N}$ -labelled WT  $\alpha$ Syn had been expressed (4 hr, 310 K) were prepared according to previously described protocols [27,28] and resuspended as a ca. 30% (v/v) slurry in unlabelled M9 media (pH 7.4, 10%  $\text{D}_2\text{O}$ , 0.001% DSS). In contrast to previous reports that  $\alpha$ Syn may be expressed in the periplasm (depending on expression conditions) [18,29,30], in our hands we find that the expressed  $\alpha$ Syn is localised entirely within the cytoplasm, and we have not detected any periplasmic fraction of  $\alpha$ Syn that is released following osmotic shock using previously reported protocols [29]. The intracellular concentration of  $\alpha$ Syn was determined by analysis of 1D  $^1\text{H}$  NMR spectra to be  $1.7 \pm 0.3$  mM. In comparison, the concentration of  $\alpha$ Syn within dopaminergic neurons has been estimated to be several hundred micromolar [31].

### NMR Spectroscopy

NMR data were acquired at 277 K, on a Bruker Avance III spectrometer equipped with a TXI cryoprobe operating at 16.4 T (700 MHz), with a unidirectional gradient coil generating a maximum gradient of  $0.55 \text{ T m}^{-1}$ .  $^{15}\text{N}$ -XSTE diffusion experiments [32] were measured in an interleaved manner between 3D experiments, and were analysed as previously described [28] in order to provide a continuous monitor of the sample integrity. BEST-HNCO experiments [33] were acquired with 8 scans per increment, a recycle delay of 200 ms, 40 points in the indirect  $^{15}\text{N}$  dimension with a spectral width of 26 ppm, and 80 points in the  $^{13}\text{C}$  dimension with a spectral width of 8 ppm. The acquisition time of each spectrum was 2.7 hours. BEST-HNCOACB experiments [34] were acquired with 4 scans per increment, a recycle delay of 200 ms, 40 points in the indirect  $^{15}\text{N}$  dimension with a spectral width of 26 ppm, and 128 points in the  $^{13}\text{C}$  dimension with a spectral width of 70 ppm. The acquisition time of each spectrum was 2.5 hours. Spectra were referenced to DSS [35] then processed with linear prediction in both indirect dimensions and co-added using nmrPipe [36].

### Deconvolution of Inhomogeneous Broadening

Processed spectra in nmrPipe format were imported into MATLAB (R2011b, The MathWorks Inc.). 3D regions centered on a selected reference peak were identified and used to define a point spread function (PSF), which was used as input for Lucy-Richardson deconvolution [37]. HNCOACB spectra were processed in stages, by generating subspectra containing only positive or negative peaks, which were deconvolved separately then recombined into a single deconvolved spectrum. The processed spectra were converted back into nmrPipe format and were analysed using CcpNmr Analysis [38].

## Results and Discussion

Monitoring the extent of protein leakage into the extracellular environment is a key challenge for in-cell NMR studies [39]. In the present work, the intracellular localization of the observed resonances was verified directly by observation of the restricted translational diffusion behavior characteristic of intracellular species [28]. One-dimensional heteronuclear ( $^{15}\text{N}$ -XSTE) diffusion measurements [32] were recorded before and after all 3D NMR measurements, using a 300 ms diffusion delay as previously described [28]. Using this non-invasive method, when the fraction

of extracellular  $\alpha$ Syn exceeded 5%, data acquisition was halted and a fresh sample was prepared. NMR analysis of an expression time course (Figure S1) showed no discernable lag phase, indicating that the species being observed constitutes the major state of  $\alpha$ Syn within the cell, in agreement with previous spectroscopic and biochemical analyses [21,40].

To determine the HN, N, CO, C $\alpha$  and C $\beta$  backbone chemical shifts of intracellular  $\alpha$ Syn a series of triple-resonance BEST-HNCO and BEST-HNCOACB experiments were recorded [33,34]. Each 3D spectrum was acquired in just 1–2 hours, which is an important factor as samples were typically found to contain significant (>5%) levels of extracellular species after just a few hours. Spectra were repeatedly acquired from a total of four samples, and were then summed to produce a final spectrum. Analysis of the chemical shift of the single histidine resonance (His50) showed that within 30 min of sample preparation, the intracellular pH was  $6.2 \pm 0.1$  (Figure S2), indicating acidification of the cytoplasm consistent with that observed previously under nutrient-depleted conditions (as pH homeostasis is an active process) [41]. Therefore, for comparison purposes HNCO and HNCOACB spectra were also acquired for a sample of isolated (monomeric)  $\alpha$ Syn in bulk solution at the same pH.

Because of the magnetically inhomogeneous environment characteristic of the dense cell samples studied here, having cell volume fractions of ca. 30%,  $\alpha$ Syn resonances exhibit a strong inhomogeneous line broadening giving rise to diagonal lineshapes (Figure 1A). This effect can result in severe resonance overlap even within 3D spectra. As this broadening arises from variations in the magnetic field strength within the sample, its effect is constant on a ppm scale irrespective of the type of nucleus. This is therefore a particular problem for the determination of  $^1\text{H}$  chemical shifts in disordered states, due to the small chemical shift dispersion of ca. 1 ppm. The observed spectrum can be represented in the frequency domain as the 'true' spectrum convolved with a three-dimensional point spread function (PSF) that reflects the distribution of magnetic field strengths found across the sample, and which is therefore the same for all residues. We note that such line broadening cannot be eliminated using non-uniform sampling (NUS) methods, although for folded proteins where resonance overlap is a less significant problem NUS sampling schemes have been demonstrated to be very effective for the rapid acquisition of in-cell NMR spectra [16].

By analogy to one-dimensional reference deconvolution methods [42] and to image restoration in optical microscopy [43], we have estimated the PSF using the three-dimensional line shape of a well-resolved and isolated resonance (T92, Figure 1A) and used this in deconvolution algorithms to restore the original, unbroadened spectrum. A variety of deconvolution methods have been described, such as the Wiener filter [44] or maximum entropy methods [45]; in this instance we have found the iterative Richardson-Lucy algorithm [37] to be particularly effective. Regions and HN projections of the in-cell HNCO spectrum of a sample of  $\alpha$ Syn expressed within cells before and after deconvolution are shown in Figure 1. The deconvolved spectra have a much more symmetric line shape, and show a significant reduction in linewidth (full width at half maximum), e.g. from  $^1\text{H}$  linewidths of  $55 \pm 1$  Hz to  $31 \pm 1$  Hz in the case of the A140 resonance (Figures 1C, 1D and S3). Such reductions in line broadening have greatly facilitated the spectral analysis that has been performed in this work.

The backbone resonances of intracellular  $\alpha$ Syn were identified and attributed by comparison with spectra of the protein in bulk solution. Figure 2A shows a representative region of the deconvolved in-cell HNCO spectrum; while small shifts in peak

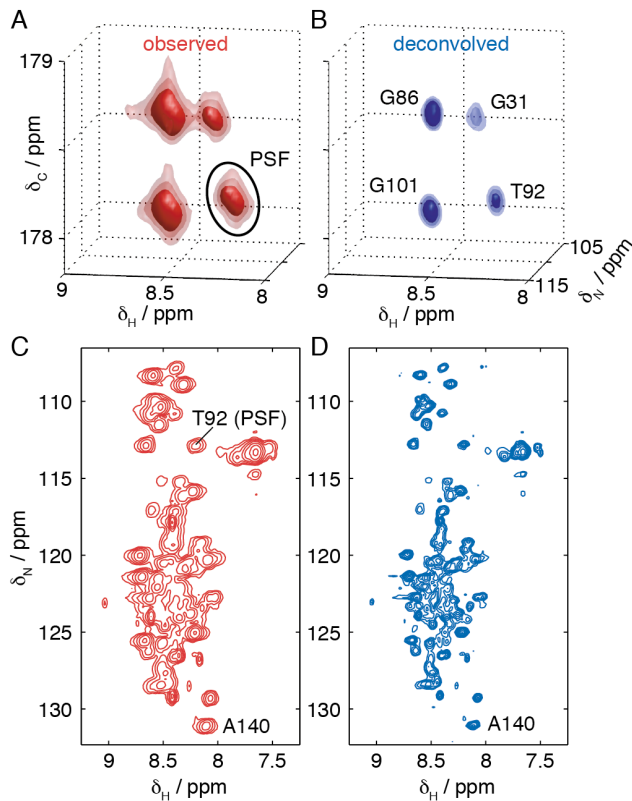

**Figure 1. Multidimensional deconvolution of in-cell NMR spectra.** HNCO spectra of  $\alpha$ Syn (A) expressed within *E. coli* cells and (B) following deconvolution using the T92 reference peak indicated in (A). (C,D)  $^1\text{H}/^{15}\text{N}$  projections of (C) the original HNCO spectrum and (D) the spectrum following deconvolution. doi:10.1371/journal.pone.0072286.g001

positions are visible, the observed resonances generally overlay closely with those from the protein in bulk solution. The chemical shift differences determined in this manner are uniformly small ( $<0.05$  ppm  $^1\text{H}$ ,  $<0.4$  ppm  $^{13}\text{C}$ ,  $<0.5$  ppm  $^{15}\text{N}$ ) across the entire sequence (Figures 2B–F). We note that the plotted chemical shift scales are greatly magnified relative to the typical range of secondary chemical shift changes. As backbone chemical shifts are sensitive indicators of secondary structure [46], these results indicate that the average conformation of the protein does not change significantly within the cellular environment. However, while many nuclei exhibit both positive and negative changes in chemical shift, N and C $\beta$  nuclei exhibit a small but systematic decrease in chemical shift values, which prompted a more detailed and quantitative analysis of the intracellular conformation and secondary structure formation.

To investigate these results in greater depth, the measured chemical shift values were translated into secondary structure populations by using the  $\delta$ 2D method [25] (Figure 3A). When backbone chemical shifts are fully determined, the  $\delta$ 2D algorithm can predict the population of secondary structures with an error of less than 10%. In some cases however, fewer chemical shifts per residue are available due to the rapid relaxation of the resonances, as discussed below. Nevertheless, quantitative comparisons between different states of a given system can still be achieved by using the same set of resonances for each residue, in such a way that systematic effects linked to the absence of chemical shifts are minimized. Secondary structure populations are shown for monomeric  $\alpha$ Syn in bulk solution, measured at the same pH as

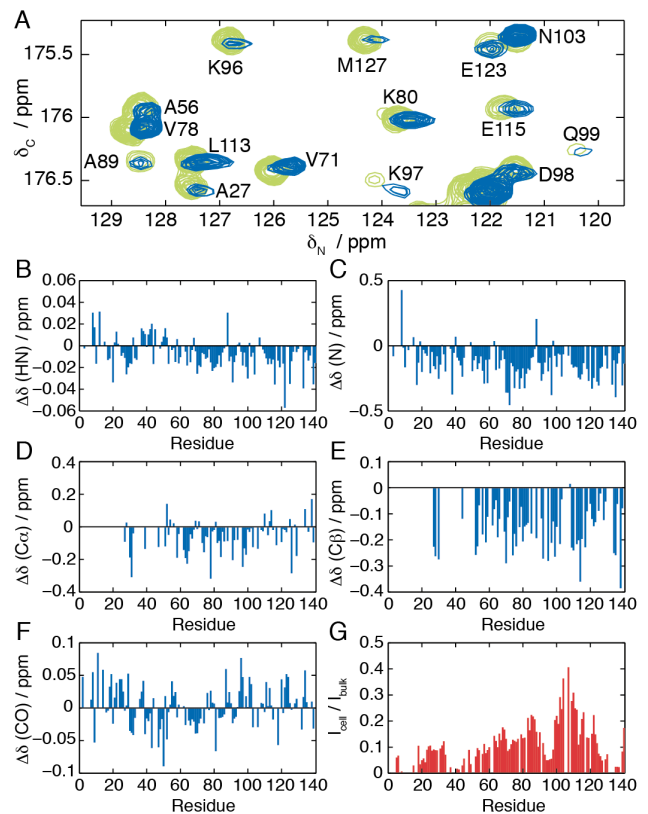

**Figure 2. Analysis of backbone chemical shift changes and line broadening.** (A) Overlay of  $^{13}\text{C}/^{15}\text{N}$  slices through the HNCO spectrum of  $\alpha$ Syn in bulk solution (green) and the deconvolved spectrum of  $\alpha$ Syn expressed within cells (blue), showing resonances with  $^1\text{H}$  chemical shifts between 8.45 and 8.55 ppm. (B–F) Backbone chemical shift changes observed for intracellular  $\alpha$ Syn relative to the protein in bulk solution. (G) Relative HNCO intensities of intracellular  $\alpha$ Syn compared to  $\alpha$ Syn in bulk aqueous solution. doi:10.1371/journal.pone.0072286.g002

found within the cell (Figure 3B), and for  $\alpha$ Syn in an  $\alpha$ -helical state formed in association with SDS micelles [12] (Figure 3C) – thought to be a mimic of  $\alpha$ -helical states populated by  $\alpha$ Syn in the presence of membranes. For every residue the difference in secondary structure content between intracellular  $\alpha$ Syn and the protein in bulk solution is less than 5% (Figure 3D), and within the uncertainties of the  $\delta$ 2D method. No increases in  $\alpha$ -helical content are observed that would be indicative of the rapidly reversible population of oligomeric [47,48] or membrane-associated states [11–13], although our observations do not preclude the existence of an NMR-invisible membrane-bound sub-population of  $\alpha$ Syn in slow exchange with the disordered state.

Although the chemical shift changes are small, and no change in the secondary structure content of  $\alpha$ Syn is detectable within the cell, some differences are nevertheless apparent in the spectra, notably marked intensity changes in the HNCO spectrum of intracellular  $\alpha$ Syn relative to the bulk solution state (Figure 2G). Decreased intensities are observed over much of the sequence, particularly in the region of the N and C-termini, and indeed as a result of this broadening no C $\alpha$  and C $\beta$  resonances could be detected between residues 1 and 26. Such peak broadening could arise from intermediate chemical exchange, indicating conformational fluctuations on a millisecond timescale, which has been observed previously in NMR studies of binding interactions involving  $\alpha$ Syn [49,50]. In particular, decreased intensities within

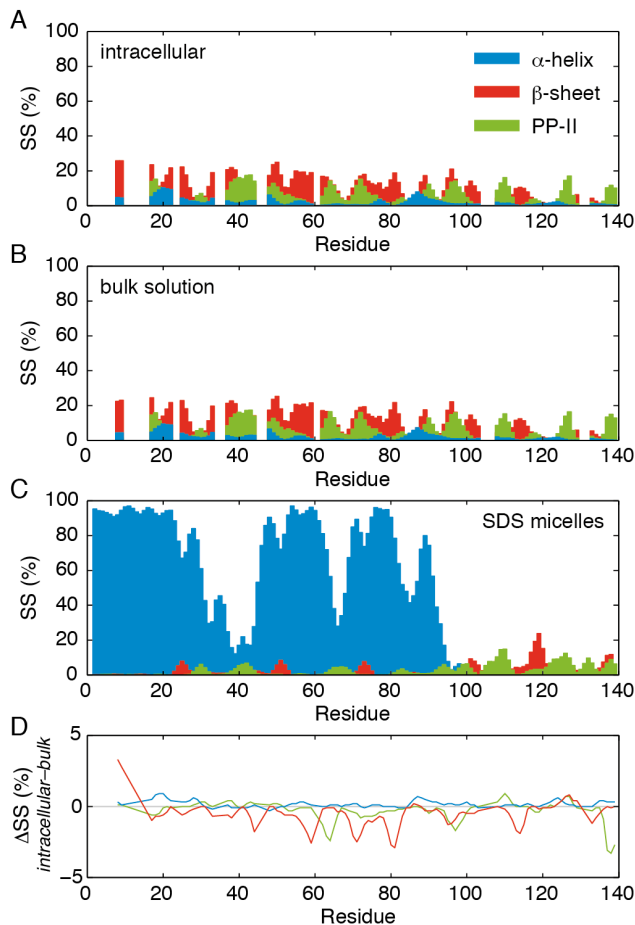

**Figure 3. Comparison of secondary structure populations in isolated and intracellular  $\alpha$ Syn.** Secondary structure populations of  $\alpha$ Syn calculated with the  $\delta$ 2D method [25] using the backbone chemical shifts of (A) intracellular  $\alpha$ Syn, (B) monomeric  $\alpha$ Syn in bulk solution at the same pH, and (C) SDS micelle-bound  $\alpha$ Syn at pH 7.4. [12] (D) Differences in secondary structure populations between intracellular and bulk solution measurements.  
doi:10.1371/journal.pone.0072286.g003

the N-terminal domain (residues 1–100) suggests that interactions may be occurring with the cell membrane, as similar intensity changes have previously been observed for the isolated protein in the presence of model membrane systems [5,13]. Within the cell however, line broadenings can also be due to transferred relaxation, as a result of weak and transient interactions with other large and slowly tumbling macromolecules within the crowded cellular environment; indeed the highly charged nature of the N and C-terminal regions of  $\alpha$ Syn may result in a particular propensity for non-specific electrostatic interactions.

## References

- Cookson MR (2005) The biochemistry of Parkinson's disease. *Annu Rev Biochem* 74: 29–52. doi:10.1146/annurev.biochem.74.082803.133400.
- Chiti F, Dobson CM (2006) Protein misfolding, functional amyloid, and human disease. *Annu Rev Biochem* 75: 333–366. doi:10.1146/annurev.biochem.75.101304.123901.
- Uversky VN, Li J, Souillac P, Millet IS, Doniach S, et al. (2002) Biophysical properties of the synucleins and their propensities to fibrillate: inhibition of alpha-synuclein assembly by beta- and gamma-synucleins. *J Biol Chem* 277: 11970–11978. doi:10.1074/jbc.M109541200.
- Weinreb PH, Zhen W, Poon AW, Conway KA, Lansbury PT (1996) NACP, a protein implicated in Alzheimer's disease and learning, is natively unfolded. *Biochemistry* 35: 13709–13715. doi:10.1021/bi961799n.
- Eliezer D, Kutluay E, Bussell R, Browne G (2001) Conformational properties of alpha-synuclein in its free and lipid-associated states. *J Mol Biol* 307: 1061–1073. doi:10.1006/jmbi.2001.4538.
- Morar AS, Olteanu A, Young GB, Pielak GJ (2001) Solvent-induced collapse of alpha-synuclein and acid-denatured cytochrome c. *Protein Sci* 10: 2195–2199. doi:10.1110/ps.24301.
- Dedmon MM, Lindorff-Larsen K, Christodoulou J, Vendruscolo M, Dobson CM (2005) Mapping long-range interactions in alpha-synuclein using spin-label NMR and ensemble molecular dynamics simulations. *J Am Chem Soc* 127: 476–477. doi:10.1021/ja044834j.
- Bertoncini CW, Jung Y-S, Fernandez CO, Hoyer W, Griesinger C, et al. (2005) Release of long-range tertiary interactions potentiates aggregation of natively

In summary, we have demonstrated that a multidimensional reference deconvolution strategy can substantially decrease the inhomogeneous line broadening associated with cellular samples, and the associated reduction in resonance overlap can greatly enhance the measurement of chemical shifts within crowded spectra. Using this approach, backbone chemical shifts have been measured for samples of  $\alpha$ Syn expressed within bacterial cells, and used to evaluate secondary structure formation in this environment. Although selective reductions in peak intensity are observed, indicative of interactions with other components of the cell, only small chemical shift differences are observed compared with monomeric  $\alpha$ Syn in bulk solution, indicating that in the crowded cytosolic environment the protein exhibits a disordered conformation whose secondary structure closely resembles that observed in studies of  $\alpha$ Syn in dilute aqueous solution. More generally, given the increasingly recognized importance of intrinsically disordered proteins or domains in many cellular processes, we believe that the approach we have described here will become an important method to investigate the structure and behavior of such molecules directly within the cellular environment.

## Supporting Information

**Figure S1** Timecourse of  $\alpha$ Syn expression in *E. coli* BL21 (DE3) Gold cells, measured as the integrated amide intensity in the first increment of a diffusion-edited  $^{15}\text{N}$  XSTE-HSQC experiment, where the gradient strength  $G=0.52\text{ T m}^{-1}$ , the gradient pulse length  $\delta=4\text{ ms}$ , and the diffusion delay  $\Delta=300\text{ ms}$ . Cell samples were diluted to a constant density ( $\text{OD}_{600}=40$ ) prior to measurement.  
(PDF)

**Figure S2** pH dependence of His50  $^1\text{H}$  chemical shift, measured for  $\alpha$ Syn in bulk solution at 277 K (blue) and fitted to a modified Henderson-Hasselbalch equation in order to estimate the cytosolic pH of cell samples in which  $\alpha$ Syn had been expressed (red).  
(PDF)

**Figure S3** Cross-sections through A140 HNC0 resonances before and after PSF deconvolution, for the determination of  $^1\text{H}$  linewidths.  
(PDF)

## Acknowledgments

We thank Dr John Kirkpatrick for valuable technical assistance with NMR experiments, and the MRC for access to the Biomedical NMR Centre at the National Institute for Medical Research, London.

## Author Contributions

Conceived and designed the experiments: CAW CMD MV JC. Performed the experiments: CAW CC LDC. Analyzed the data: CAW CC CMD MV JC. Contributed reagents/materials/analysis tools: AWPF. Wrote the paper: CAW CC CMD MV JC.

- unstructured alpha-synuclein. *Proc Natl Acad Sci USA* 102: 1430–1435. doi:10.1073/pnas.0407146102.
9. Bernadó P, Bertocini CW, Griesinger C, Zweckstetter M, Blackledge M (2005) Defining long-range order and local disorder in native alpha-synuclein using residual dipolar couplings. *J Am Chem Soc* 127: 17968–17969. doi:10.1021/ja055538p.
  10. Allison JR, Varnai P, Dobson CM, Vendruscolo M (2009) Determination of the free energy landscape of alpha-synuclein using spin label nuclear magnetic resonance measurements. *J Am Chem Soc* 131: 18314–18326. doi:10.1021/ja904716h.
  11. Davidson WS, Jonas A, Clayton DF, George JM (1998) Stabilization of alpha-synuclein secondary structure upon binding to synthetic membranes. *J Biol Chem* 273: 9443–9449.
  12. Ulmer TS, Bax A, Cole NB, Nussbaum RL (2005) Structure and dynamics of micelle-bound human alpha-synuclein. *J Biol Chem* 280: 9595–9603. doi:10.1074/jbc.M411805200.
  13. Bodner CR, Dobson CM, Bax A (2009) Multiple tight phospholipid-binding modes of alpha-synuclein revealed by solution NMR spectroscopy. *J Mol Biol* 390: 775–790. doi:10.1016/j.jmb.2009.05.066.
  14. Serber Z, Keatinge-Clay AT, Ledwidge R, Kelly AE, Miller SM, et al. (2001) High-resolution macromolecular NMR spectroscopy inside living cells. *J Am Chem Soc* 123: 2446–2447.
  15. Burz DS, Dutta K, Cowburn D, Shekhtman A (2006) Mapping structural interactions using in-cell NMR spectroscopy (STINT-NMR). *Nat Methods* 3: 91–93. doi:10.1038/nmeth851.
  16. Sakakibara D, Sasaki A, Ikeya T, Hamatsu J, Hanashima T, et al. (2009) Protein structure determination in living cells by in-cell NMR spectroscopy. *Nature* 458: 102–105. doi:10.1038/nature07814.
  17. Inomata K, Ohno A, Tochio H, Isogai S, Tenno T, et al. (2009) High-resolution multi-dimensional NMR spectroscopy of proteins in human cells. *Nature* 458: 106–109. doi:10.1038/nature07839.
  18. McNulty BC, Young GB, Pielak GJ (2006) Macromolecular crowding in the Escherichia coli periplasm maintains alpha-synuclein disorder. *J Mol Biol* 355: 893–897. doi:10.1016/j.jmb.2005.11.033.
  19. Li C, Charlton LM, Lakkavaram A, Seagle C, Wang G, et al. (2008) Differential dynamical effects of macromolecular crowding on an intrinsically disordered protein and a globular protein: implications for in-cell NMR spectroscopy. *J Am Chem Soc* 130: 6310–6311. doi:10.1021/ja801020z.
  20. Bertini I, Felli IC, Gonnelli L, Kumar MVV, Pierattelli R (2011) 13C Direct-Detection Biomolecular NMR Spectroscopy in Living Cells. *Angew Chem Int Ed* 50: 2339–2341. doi:10.1002/anie.201006636.
  21. Binolfi A, Theillet F-X, Selenko P (2012) Bacterial in-cell NMR of human  $\alpha$ -synuclein: a disordered monomer by nature? *Biochem Soc Trans* 40: 950–954. doi:10.1042/BST20120096.
  22. Li C, Wang G-F, Wang Y, Creager-Allen R, Lutz EA, et al. (2010) Protein 19F NMR in Escherichia coli. *J Am Chem Soc* 132: 321–327. doi:10.1021/ja907966n.
  23. Fauvet B, Fares M-B, Samuel F, Dikiy I, Tandon A, et al. (2012) Characterization of semisynthetic and naturally N $\alpha$ -acetylated  $\alpha$ -synuclein in vitro and in intact cells: implications for aggregation and cellular properties of  $\alpha$ -synuclein. *J Biol Chem* 287: 28243–28262. doi:10.1074/jbc.M112.383711.
  24. Maltsev AS, Ying J, Bax A (2012) Impact of N-terminal acetylation of  $\alpha$ -synuclein on its random coil and lipid binding properties. *Biochemistry* 51: 5004–5013. doi:10.1021/bi300642h.
  25. Camilloni C, De Simone A, Vranken WF, Vendruscolo M (2012) Determination of secondary structure populations in disordered states of proteins using nuclear magnetic resonance chemical shifts. *Biochemistry* 51: 2224–2231. doi:10.1021/bi3001825.
  26. Waudby CA, Knowles TPJ, Devlin GL, Skepper JN, Ecroyd H, et al. (2010) The interaction of alphaB-crystallin with mature alpha-synuclein amyloid fibrils inhibits their elongation. *Biophys J* 98: 843–851. doi:10.1016/j.bpj.2009.10.056.
  27. Serber Z, Selenko P, Hänsel R, Reckel S, Löhr F, et al. (2006) Investigating macromolecules inside cultured and injected cells by in-cell NMR spectroscopy. *Nat Protoc* 1: 2701–2709. doi:10.1038/nprot.2006.181.
  28. Waudby CA, Mantle MD, Cabrita LD, Gladden LF, Dobson CM, et al. (2012) Rapid distinction of intracellular and extracellular proteins using NMR diffusion measurements. *J Am Chem Soc* 134: 11312–11315. doi:10.1021/ja304912c.
  29. Huang C, Ren G, Zhou H, Wang C-C (2005) A new method for purification of recombinant human alpha-synuclein in Escherichia coli. *Protein Expr Purif* 42: 173–177. doi:10.1016/j.pep.2005.02.014.
  30. Slade KM, Baker R, Chua M, Thompson NL, Pielak GJ (2009) Effects of recombinant protein expression on green fluorescent protein diffusion in Escherichia coli. *Biochemistry* 48: 5083–5089. doi:10.1021/bi9004107.
  31. Uversky VN, Li J, Fink AL (2001) Metal-triggered structural transformations, aggregation, and fibrillation of human alpha-synuclein. A possible molecular NK between Parkinson's disease and heavy metal exposure. *J Biol Chem* 276: 44284–44296. doi:10.1074/jbc.M105343200.
  32. Ferrage F, Zoonens M, Warschawski DE, Popot J-L, Bodenhausen G (2003) Slow diffusion of macromolecular assemblies by a new pulsed field gradient NMR method. *J Am Chem Soc* 125: 2541–2545. doi:10.1021/ja0211407.
  33. Schanda P, Van Melckebeke H, Brutscher B (2006) Speeding up three-dimensional protein NMR experiments to a few minutes. *J Am Chem Soc* 128: 9042–9043. doi:10.1021/ja062025p.
  34. Lescop E, Schanda P, Brutscher B (2007) A set of BEST triple-resonance experiments for time-optimized protein resonance assignment. *J Magn Reson* 187: 163–169. doi:10.1016/j.jmr.2007.04.002.
  35. Wishart DS, Bigam CG, Yao J, Abildgaard F, Dyson HJ, et al. (1995) 1H, 13C and 15N chemical shift referencing in biomolecular NMR. *J Biomol NMR* 6: 135–140.
  36. Delaglio F, Grzesiek S, Vuister GW, Zhu G, Pfeifer J, et al. (1995) NMRPipe: a multidimensional spectral processing system based on UNIX pipes. *J Biomol NMR* 6: 277–293.
  37. Biggs DS, Andrews M (1997) Acceleration of iterative image restoration algorithms. *Appl Opt* 36: 1766–1775.
  38. Vranken WF, Boucher W, Stevens TJ, Fogh RH, Pajon A, et al. (2005) The CCPN data model for NMR spectroscopy: development of a software pipeline. *Proteins* 59: 687–696. doi:10.1002/prot.20449.
  39. Barnes CO, Pielak GJ (2011) In-cell protein NMR and protein leakage. *Proteins* 79: 347–351. doi:10.1002/prot.22906.
  40. Fauvet B, Mbefo MK, Fares M-B, Desobry C, Michael S, et al. (2012)  $\alpha$ -Synuclein in central nervous system and from erythrocytes, mammalian cells, and Escherichia coli exists predominantly as disordered monomer. *J Biol Chem* 287: 15345–15364. doi:10.1074/jbc.M111.318949.
  41. Booth IR (1985) Regulation of cytoplasmic pH in bacteria. *Microbiol Rev* 49: 359–378.
  42. Metz KR, Lam MM, Webb AG (2000) Reference deconvolution: a simple and effective method for resolution enhancement in nuclear magnetic resonance spectroscopy. *Concepts Magn Reson* 12: 21–42.
  43. Sarder P, Nehorai A (2006) Deconvolution methods for 3-D fluorescence microscopy images. *IEEE Signal Process Mag* 23: 32–45. doi:10.1109/MSP.2006.1628876.
  44. Puetter RC, Gosnell TR, Yahil A (2005) Digital Image Reconstruction: Deblurring and Denoising. *Annu Rev Astro Astrophys* 43: 139–194. doi:10.1146/annurev.astro.43.112904.104850.
  45. Gull SF, Daniell GJ (1978) Image reconstruction from incomplete and noisy data. *Nature* 272: 686–690. doi:10.1038/272686a0.
  46. Wishart DS, Sykes BD (1994) Chemical shifts as a tool for structure determination. *Meth Enzymol* 239: 363–392.
  47. Bartels T, Choi JG, Selkoe DJ (2011)  $\alpha$ -Synuclein occurs physiologically as a helically folded tetramer that resists aggregation. *Nature* 477: 107–110. doi:10.1038/nature10324.
  48. Wang W, Perovic I, Chittiluru J, Kaganovich A, Nguyen LTT, et al. (2011) A soluble  $\alpha$ -synuclein construct forms a dynamic tetramer. *Proc Natl Acad Sci USA* 108: 17797–17802. doi:10.1073/pnas.1113260108.
  49. Lendel C, Bertocini CW, Cremades N, Waudby CA, Vendruscolo M, et al. (2009) On the mechanism of nonspecific inhibitors of protein aggregation: dissecting the interactions of alpha-synuclein with Congo red and lacmoid. *Biochemistry* 48: 8322–8334. doi:10.1021/bi901285x.
  50. De Genst EJ, Guilleams T, Wellens J, O'Day EM, Waudby CA, et al. (2010) Structure and properties of a complex of  $\alpha$ -synuclein and a single-domain camelid antibody. *J Mol Biol* 402: 326–343. doi:10.1016/j.jmb.2010.07.001.
