# Supplementary material for: In-Cell NMR Characterization of the Secondary Structure Populations of a Disordered Conformation of α-Synuclein within E. coli Cells
Source: PubMed Central journal article supplement (PMC3753296; doi:10.1371/journal.pone.0072286), 2013-08-26

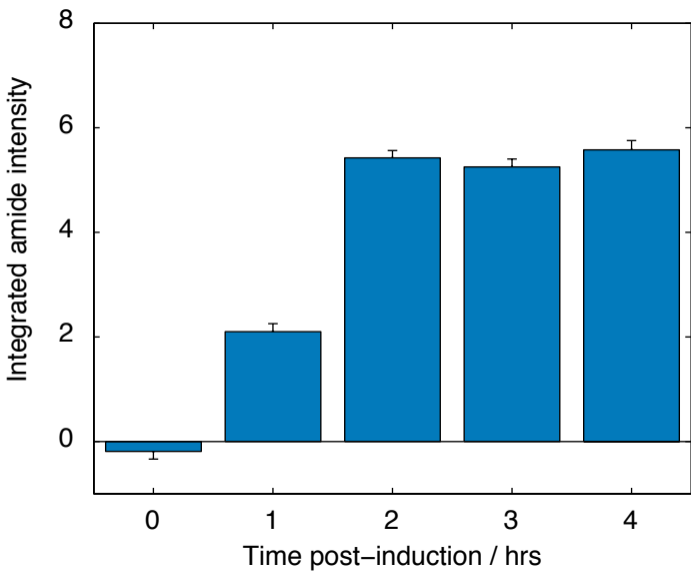

Supplement: pone.0072286.s001.pdf [file pone.0072286.s001.pdf]
